# Supplementary material
Source: Springer Nature journal article supplement (https://www.springermedizin.de/resource/supplementary/12967_2008_319_MOESM3_ESM.pdf/9576368)
Supplement: MOESM3 [file 9576368]

**A****TRIP-Br2/SERTAD2 (H. sapiens)**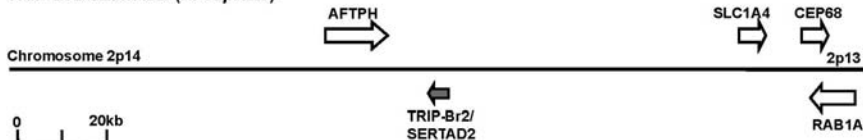**B****TRIP-Br2/SERTAD2 (H. sapiens)**

Chromosome 2p14

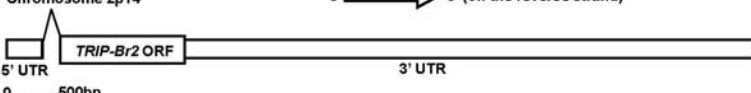**C**

|                              |                                                                  |     |
|------------------------------|------------------------------------------------------------------|-----|
| NP_001020074 (R. norvegicus) | MLGKGGKRRKFEDEHDEGLEGKVVFP---SDAPSRVSYTLQRQTI FNISLMKLYNHRFLTEP  | 57  |
| NP_001033714 (M. musculus)   | MLGKGGKRRKFEDEHDEGLEGKIVSP---SDGFSRVSYTLQRQTI FNISLMKLYNHRFLTEP  | 57  |
| NP_055570 (H. sapiens)       | MLGKGGKRRKFEDEHDEGLEGKIVSP---CDGFSRVSYTLQRQTI FNISLMKLYNHRFLTEP  | 57  |
| XP_515728 (P. troglodytes)   | MLGKGGKRRKFEDEHDEGLEGKIVSP---CDGFSRVSYTLQRQTI FNISLMKLYNHRFLTEP  | 57  |
| XP_001088920 (M. mulatta)    | MLGKGGKRRKFEDEHDEGLEGKIVSP---CDGFSRVSYTLQRQTI FNISLMKLYNHRFLTEP  | 57  |
| NP_001026208 (G. gallus)     | MLGKGGKRRKFEDEHDEGLEGKIVSP---TDGFSRVSYTLQRQTI FNISLMKLYNHRFLTEP  | 57  |
| NP_997959 (D. rerio)         | MLGKGAARKLDEDEEGLEGKALAGAGAEGLSKVSYTLQRQTI FNMSLMKLYNHRVAFTEP    | 60  |
| NP_001020074 (R. norvegicus) | SLQKTVLINNMLRRIQEELKQEGSLRPTFFPFSQPSD-SLSDSYREAPFAFTFPL-----     | 110 |
| NP_001033714 (M. musculus)   | SLQKTVLINNMLRRIQEELKQEGSLRPTFFPFSQPSN-SLSDSYQEAPE-----           | 105 |
| NP_055570 (H. sapiens)       | SLQKTVLINNMLRRIQEELKQEGSLRPMFTFFSQPTT-EPDSDYREAPFAFZHL-----      | 110 |
| XP_515728 (P. troglodytes)   | SLQKTVLINNMLRRIQEELKQEGSLRPMFTFFSQPTT-EPDSDYREAPFAFZHL-----      | 110 |
| XP_001088920 (M. mulatta)    | SLQKTVLINNMLRRIQEELKQEGSLRPMFTFFSQPTT-EPDSDYREAPFAFZHL-----      | 110 |
| NP_001026208 (G. gallus)     | SLQKTVLINNMLRRIQEELKQEGSLRPMFTFFSQPAD-PLSDINREAPQAFZHL-----      | 110 |
| NP_997959 (D. rerio)         | SLEKRVLINNMLRRIQDELKQGNLRPLFPFSPFEDDFVDESFRPQFAFVSLMVAFP         | 120 |
| NP_001020074 (R. norvegicus) | ---ASFPHFCDLGSSIT-----PLEACLTFFASLLEED-DTFTCTLQA-VHFAAPTRLSS     | 159 |
| NP_001033714 (M. musculus)   | ---FAFHFCDLGSSIT-----PLEACLTFFASLLEEDNDDTFCTLQA-VHFAAPTRLSS      | 153 |
| NP_055570 (H. sapiens)       | ---ASFSPHCDLGSSIT-----PLEACLTFFASLLEED-DTFTCTSGA-MQPTAPTKLSP     | 159 |
| XP_515728 (P. troglodytes)   | ---ASFSPHCDLGSSIT-----PLEACLTFFASLLEED-DTFTCTSGA-MQPTAPTKLSP     | 159 |
| XP_001088920 (M. mulatta)    | ---AFSPSHCDLGSSIT-----PLEACLTFFASLLEED-DTFTCTSGA-MQPTAPTKLSP     | 159 |
| NP_001026208 (G. gallus)     | ---ASFSLLPDLVSSIT-----PLESCLTFFASLLEED--TFTSFT-VQHDGPTKLFP       | 157 |
| NP_997959 (D. rerio)         | ISQSPALSSASLITSPSSGLSNPAPLEACLTFFAPLEED-NVSLCTSPSLAPPAPTRLS      | 179 |
| NP_001020074 (R. norvegicus) | FALFAEKDSSPSALDEIEELCF---TSSTEAATAAAT---EGSKGTS-----SET          | 204 |
| NP_001033714 (M. musculus)   | FALFAEKDSSPSALDEIEELCF---TSSTEAATAAAT---EGSKGTS-----SET          | 198 |
| NP_055570 (H. sapiens)       | FALLFAEKDSPSALDEIEELCF---SSTEAATAAT---DSVKGTS-----SEA            | 203 |
| XP_515728 (P. troglodytes)   | FALFAEKDSSPSALDEIEELCF---SSTEAATAAAT---DSVKGTS-----SEA           | 203 |
| XP_001088920 (M. mulatta)    | FALFAEKDSSPSALDEIEELCF---SSTEAATAAAT---DSVKGTS-----SEA           | 203 |
| NP_001026208 (G. gallus)     | FALGFVKDSSPSALDEIEELCF---APTSARAVAAVAESAGSDSKAH-----CEB          | 205 |
| NP_997959 (D. rerio)         | PSVA---RDSPSALDEIEELCFSPLELTA'ATSAPGATSPSFLQLCFPSLNSGALDSDKCSKPF | 237 |
| NP_001020074 (R. norvegicus) | SVQKPEGPQ---EGRTDSDSRFMDSLPGN-FEITTS----TGFLTDLTLDLDFADIDTS      | 255 |
| NP_001033714 (M. musculus)   | SVQKPEGPQ---EGRTDSDSRFMDSLPGN-FEITTS----TGFLTDLTLDLDFADIDTS      | 249 |
| NP_055570 (H. sapiens)       | GTQKLDGPG---ESRADSKLMSLPGN-FEITTS----TGFLTDLTLDLDFADIDTS         | 254 |
| XP_515728 (P. troglodytes)   | GTQKLDGPG---ESRADSKLMSLPGN-FEITTS----TGFLTDLTLDLDFADIDTS         | 254 |
| XP_001088920 (M. mulatta)    | GAQKPEGPQ---ESPTDSDKMDLPGN-FEITTS----TGFLTDLTLDLDFADIDTS         | 254 |
| NP_001026208 (G. gallus)     | SVFELEGVA---ESRTAESKLMDELPGN-FEITTS----TGFLTDLTLDLDFADIDTS       | 256 |
| NP_997959 (D. rerio)         | CSPKLEGLVLAERSAVNTEPELTFNLDMSSTPSSSSGGFTDLALDLDLDFADIDTS         | 297 |
| NP_001020074 (R. norvegicus) | MYDPEFCTSASGTA-SKMAP-VSADLLKTLAPYS-NQVAFSPQFKMDLTELHDHIMEV       | 311 |
| NP_001033714 (M. musculus)   | MYDPEFCTSASGTA-SKMAP-VSADLLKTLAPYS-NQVAFSPQFKMDLTELHDHIMEV       | 305 |
| NP_055570 (H. sapiens)       | MYDPEFCTSASGTA-SKMAP-VSADLLKTLAPYS--SQVAFSPQFKMDLTELHDHIMEV      | 310 |
| XP_515728 (P. troglodytes)   | MYDPEFCTSASGTA-SKMAP-VSADLLKTLAPYS--SQVAFSPQFKMDLTELHDHIMEV      | 310 |
| XP_001088920 (M. mulatta)    | MYDPEFCTSASGTA-SKMAP-VSADLLKTLAPYS--SQVAFSPQFKMDLTELHDHIMEV      | 310 |
| NP_001026208 (G. gallus)     | MYDPEFCTSASGTA-SKMAP-VSADLLKTLAPYS--SQVAFSPQFKMDLTELHDHIMEV      | 312 |
| NP_997959 (D. rerio)         | MYDPEFCTSASGTA-SKMAP-VSADLLKTLAPYS--SQVAFSPQFKMDLTELHDHIMEV      | 357 |
| NP_001020074 (R. norvegicus) | LVGS 315                                                         |     |
| NP_001033714 (M. musculus)   | LVGS 309                                                         |     |
| NP_055570 (H. sapiens)       | LVGS 314                                                         |     |
| XP_515728 (P. troglodytes)   | LVGS 314                                                         |     |
| XP_001088920 (M. mulatta)    | LVGS 314                                                         |     |
| NP_001026208 (G. gallus)     | LVGS 316                                                         |     |
| NP_997959 (D. rerio)         | LVGS 361                                                         |     |
